# Supplementary material for: Delineation between different components of chronic pain using dimension reduction – an ASL fMRI study in hand osteoarthritis
Source: PubMed Central journal article supplement (PMC6055802; doi:10.1002/ejp.1212), 2018-04-16

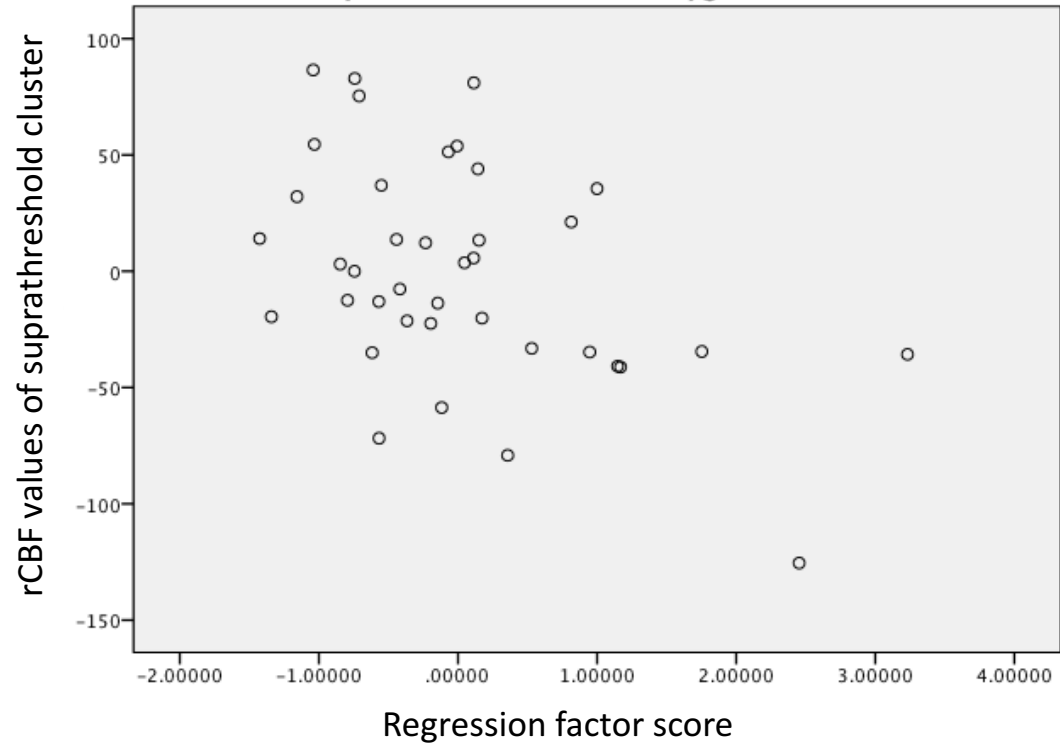

Supplement: EJP-22-1245-s001.pdf [file EJP-22-1245-s001.pdf]
